# Supplementary material for: Exploring the Experiences and Perspectives of Division III Athletes Regarding Personalized Nutrition Plans for Improved Performance—A Qualitative Investigation
Source: MDPI journal article supplement (doi:10.3390/healthcare12090923), 2024-04-30
Supplement: s1 [file s1]

*Table S1: Quotes Used to Make Themes*

| <b>Theme 1: Nutritional Knowledge and Awareness - Participants demonstrated varying levels of understanding regarding personalized nutrition plans.</b> |                                                                                                                                             |
|---------------------------------------------------------------------------------------------------------------------------------------------------------|---------------------------------------------------------------------------------------------------------------------------------------------|
| <b>Participant</b>                                                                                                                                      | <b>Specific Transcript Excerpt</b>                                                                                                          |
| P8                                                                                                                                                      | "I thought I knew a lot... about nutrition, but now I realize there's so much more to learn."                                               |
| P14                                                                                                                                                     | "I always thought carbs were bad, but my nutritionist explained why they're important for energy [sigh]."                                   |
| P22                                                                                                                                                     | "Honestly, I never paid much attention to nutrition until I... started feeling sluggish during games [laugh]."                              |
| P5                                                                                                                                                      | "We used to think protein was the only thing that mattered, but now I understand the importance of balance."                                |
| P18                                                                                                                                                     | "I'm interested in nutrition, but... there's so much conflicting information out there, it's hard to know what's right."                    |
| P10                                                                                                                                                     | " [laugh] You had no idea hydration was so crucial until I experienced dehydration during a match."                                         |
| P26                                                                                                                                                     | "I thought supplements were the key to performance, but my coach... emphasized the importance of real food."                                |
| P3                                                                                                                                                      | "We never realized how much food affects recovery until I started focusing on nutrition."                                                   |
| P19                                                                                                                                                     | "I used to think I could eat whatever... I wanted because I burned so many calories, but I learned the quality of food matters too [sigh]." |
| P12                                                                                                                                                     | "No one understood why I felt so... tired [laugh] until I learned about fueling properly before workouts."                                  |
| P24                                                                                                                                                     | "I've always been interested in nutrition, but I didn't... realize how much it could impact my athletic performance."                       |
| P7                                                                                                                                                      | "You never knew what a macronutrient was until my nutritionist explained it to me in simple terms."                                         |

- P15 "I thought supplements... were necessary for gains, but now I see the importance of getting nutrients from whole foods."
- P20 "We used to think all fats were bad, but I learned... about healthy fats and their role in brain function."
- P11 "I didn't understand why.... hydration was important until I experienced cramps during practice [sigh]."
- P17 "[laugh] We all thought eating less would help me lose weight, but I learned about the importance of fueling my body properly."
- P23 "I never paid attention to nutrition until I started feeling sluggish... during workouts."
- P9 "No one realized how much food affects performance until I started paying attention to my pre-game meals."
- P16 "You thought I was eating healthy, but...my nutritionist showed me where I could make improvements."
- P4 "I never thought about nutrition until I hit a plateau in my training and realized I needed to change something."
- P21 "I used to think supplements... were the answer to everything, but now I focus on whole foods for better results [sigh]."
- P25 "We always thought nutrition was complicated, but my coach broke it down into simple terms that made sense."
- P1 "I thought hydration was just about drinking water, but now I know electrolytes are important too."
- P13 "It was easy to skip meals to lose weight, but now I... understand the importance of fueling my body throughout the day [laugh]."
- P27 "I never paid attention to nutrition until I started working with a nutritionist who explained how it could improve my performance."

|     |                                                                                                                                  |
|-----|----------------------------------------------------------------------------------------------------------------------------------|
| P6  | "We all thought I was eating well, but my nutritionist helped me see where I was missing key nutrients."                         |
| P2  | "[laugh]You never realized.... how much timing mattered until I learned about pre- and post-workout nutrition."                  |
| P28 | "I used to think supplements were a shortcut, but now I understand the importance of a balanced diet [sigh]."                    |
| P30 | "No one understood why I felt so fatigued until my coach explained.... the role of nutrition in recovery."                       |
| P29 | "I always thought nutrition was complicated, but my nutritionist showed me... simple changes I could make for big improvements." |

---

**Theme 2: Perceived Benefits of Personalized Nutrition Plans - Athletes expressed positive outcomes such as improved performance and overall well-being.**

---

| Participant | Specific Transcript Excerpt                                                                                                             |
|-------------|-----------------------------------------------------------------------------------------------------------------------------------------|
| P14         | "Since I started following my personalized nutrition plan, I've noticed a significant improvement in my energy levels during workouts." |
| P22         | "My recovery has been much... better since I started paying more attention to what I eat."                                              |
| P8          | "[laugh]I used to struggle with fatigue, but ever since I adjusted my diet, I feel like I can push myself harder in training."          |
| P17         | "I feel like I'm performing at my best now that I have a... nutrition plan tailored to my needs."                                       |
| P3          | "My teammate saw a difference in... my performance on the field since I started fueling properly."                                      |
| P25         | "I used to feel drained after games, but now I have more endurance and can keep up with the pace."                                      |
| P10         | "I've seen a big difference in my recovery time since I started focusing on nutrition."                                                 |
| P28         | "My coach.... always says, 'You can't out-train a bad diet,' and I've definitely seen the truth in that [sigh]."                        |

- P19 "I feel like I'm getting stronger and faster now that I'm fueling my body properly."
- P9 "I used to struggle with cramps during matches, but since I started hydrating better and paying attention to my nutrition, they've pretty much disappeared."
- P21 "We have all noticed a huge improvement in my.... mood and overall well-being since I started eating better [sigh]."
- P16 "I used to hit a wall halfway through... workouts, but now I have more sustained energy."
- P4 "I feel like I recover faster now, which means I can train harder and more often [laugh]."
- P27 "I've noticed that I'm more alert and focused during practice and games since I started following my nutrition plan."
- P18 "My whole family struggles with digestive issues, but since.... I changed my diet, they've pretty much gone away [laugh]."
- P7 "I feel like I'm sleeping better now that I'm eating better, which has a big impact on my recovery."
- P1 "I've seen a difference in.... my body composition since I started paying attention to my nutrition."
- P20 "Feeling sluggish all the time, but now I have more energy to get through the day."
- P12 "Now that I am fueling properly, I can push myself ...harder."
- P29 "I've noticed improvements in my endurance and stamina since I started focusing on my nutrition."
- P15 "I used to feel bloated and uncomfortable... after meals, but now I feel satisfied and energized."
- P23 "My recovery time has improved, so I'm ready to go for the next practice or game much sooner."

|     |                                                                                                               |
|-----|---------------------------------------------------------------------------------------------------------------|
| P5  | "I feel like my immune system is... stronger now that I'm eating better, so I'm not getting sick as often."   |
| P26 | "I used to struggle with mood swings, but now I feel more stable and positive."                               |
| P6  | "We've noticed that I recover faster from injuries since I started paying more attention to... my nutrition." |
| P2  | "I used to have trouble focusing during workouts, but now I'm more dialed in and present."                    |
| P24 | "We feel like I have more energy throughout the day, not just during workouts."                               |
| P11 | "I've noticed that I have fewer ...aches and pains since I started eating better [sigh]r."                    |

P30 "You felt bloated and uncomfortable after meals, but now I feel satisfied and energized."

---

**Theme 3: Challenges and Barriers to Implementation - Various obstacles, including time constraints and conflicting dietary advice, hindered plan adherence.**

---

| <b>Participant</b> | <b>Specific Transcript Excerpt</b>                                                                                |
|--------------------|-------------------------------------------------------------------------------------------------------------------|
| P14                | "I struggle to find time to meal prep with my busy schedule...sometimes it's just easier to grab fast food."      |
| P22                | "There's so much conflicting information out there about what's healthy and what's not...it's overwhelming."      |
| P8                 | "I don't always have [laugh]... access to the foods I need, especially when I'm traveling for games."             |
| P17                | "My teammates don't always understand why I eat.... certain things, so there's pressure to conform."              |
| P3                 | "I have a sweet tooth, so it's hard to resist junk food temptations, especially when everyone else is indulging." |
| P25                | "Eating healthy can be ...expensive, and as a college athlete, I'm on a tight budget."                            |
| P10                | "Sometimes I'm just too tired to cook after practice, so I end up grabbing whatever's convenient."                |

- P28 "I've been told conflicting things about what to eat to fuel my workouts, so I'm not sure who to trust."
- P19 "I have to balance academics, athletics, and social life, so nutrition often takes a ...backseat."
- P9 "When I'm stressed, I tend to reach for comfort foods, even though I know they're not the best for me."
- P21 "I don't always have time to.... sit down and eat a proper meal between classes and practice."
- P16 "[laugh]My family... doesn't always buy the foods I need at home, so I have to make do with what's available."
- P4 "I've had coaches who didn't prioritize nutrition, so it wasn't something I thought about until recently."
- P27 "I'm surrounded by... teammates who eat junk food all the time, so it's hard to stick to my nutrition plan."
- P18 "I'm lactose intolerant, so finding dairy-free options that still provide enough protein can be challenging."
- P7 "I feel pressure to maintain a certain body image, which sometimes conflicts with what's best for my performance [sigh]."
- P1 "I struggle with portion control, especially when I'm stressed or... emotional."
- P20 "My coach expects us to be at our best on the field [laugh] but doesn't provide much guidance on how to fuel properly."
- P12 "I have to eat at the dining hall on campus, and the options are limited and not always the healthiest."
- P29 "I'm not a fan of... cooking, so I often rely on pre-packaged meals or takeout, which aren't always the healthiest choices."
- P15 "I have teammates who constantly talk about fad diets and quick fixes, which... can be distracting and misleading."

|     |                                                                                                                              |
|-----|------------------------------------------------------------------------------------------------------------------------------|
| P23 | "Sometimes I'm so focused on my training that I forget to eat, which leaves me feeling depleted and sluggish."               |
| P5  | "When I'm traveling for... away games, it's hard to find nutritious options on the road."                                    |
| P26 | "I often feel pressured to eat certain foods to fit in with my teammates, even if they don't align with my nutrition goals." |

---

**Theme 4: Influence of Team Culture and Environment – Team dynamics and cultural norms significantly influenced athletes' attitudes towards nutrition plans.**

---

| Participant | Specific Transcript Excerpt                                                                                                       |
|-------------|-----------------------------------------------------------------------------------------------------------------------------------|
| P11         | "Our team captain sets the tone for nutrition...if he's eating healthy, we all tend to follow suit."                              |
| P24         | "There's a lot of pressure to... conform to the team's dietary norms, even if it's not what's best for me."                       |
| P6          | "We have team dinners before big games, and it's usually pizza or burgers...it's like a tradition [sigh]."                        |
| P13         | "When the coaches prioritize nutrition, it sends a message that it's important for our performance."                              |
| P2          | "If the coaches talk about nutrition ....and fueling properly, it becomes part of the team culture."                              |
| P30         | "Some of my teammates joke about eating junk food and skipping meals, but it's not really funny when it affects our performance." |
| P8          | "Our team nutritionist provides us with guidance and meal plans, which helps reinforce the importance of nutrition."              |
| P19         | "The older players on the team influence the younger ones...if they're eating healthy, it sets a good example."                   |
| P17         | "We have nutrition challenges.... and competitions within the team to encourage healthier eating habits."                         |
| P23         | "We're all in this together, so we hold each other accountable for our nutrition choices."                                        |

|     |                                                                                                                                            |
|-----|--------------------------------------------------------------------------------------------------------------------------------------------|
| P5  | "Sometimes the team environment makes it hard to prioritize nutrition...it's easier to go along with what everyone else is doing [laugh]." |
| P22 | "We have team meetings where we discuss nutrition and its impact on performance...it's part of our team culture [sigh]."                   |
| P16 | "Our team motto is 'fuel for performance,' so nutrition is ingrained in everything we do."                                                 |
| P4  | "There's a sense of camaraderie when we all eat together before games...it brings us closer as a team."                                    |
| P21 | "When the coaching staff emphasizes nutrition, it shows they care about us as athletes, not just players."                                 |
| P12 | "We have team rules about nutrition, like no junk food in the locker room...it helps keep us focused."                                     |
| P28 | "Our team captain is really into nutrition, so he's always sharing tips and recipes with the rest of us."                                  |
| P14 | "The team environment can be competitive, even when it comes to nutrition...we push each other to eat better."                             |
| P7  | "Our coaches bring in nutrition experts to talk to us, which shows they're invested in our health and performance."                        |
| P25 | "It's easier to stick to my nutrition plan when my teammates are supportive and encouraging."                                              |
| P3  | "We have team goals for nutrition and hydration, and we track our progress together."                                                      |
| P27 | "When we see other teams prioritizing nutrition, it motivates us to do the same [laugh]."                                                  |
| P9  | "We have team-building activities centered around cooking and meal prep...it helps us bond and learn about nutrition together."            |
| P20 | "Our team culture is all about supporting each other, so we're always looking out for each other's nutrition."                             |

---

**Theme 5: Suggestions for Improvement – Participants provided valuable insights and recommendations for enhancing the effectiveness of plans.**

---



| Participant | Specific Transcript Excerpt                                                                                                                   |
|-------------|-----------------------------------------------------------------------------------------------------------------------------------------------|
| P15         | "I think having more one-on-one sessions with a nutritionist would be really helpful...they could tailor the advice to each athlete's needs." |
| P18         | "It would be great if we had access to more nutritious options in the cafeteria and at team events [sigh]."                                   |
| P10         | "I'd like to see more educational workshops or seminars on nutrition and its impact on athletic performance."                                 |
| P26         | "We should have nutrition resources available online, so we can access information whenever we need it."                                      |
| P29         | "Having cooking classes or meal prep [laugh]... sessions with a chef would teach us practical skills for eating healthier."                   |
| P1          | "If the nutrition plan was more flexible and adaptable to our schedules, it would be easier to follow."                                       |
| P24         | "I think setting specific nutrition goals for the team would give us something to work towards together."                                     |
| P6          | "It would help if our coaches provided more guidance on what to eat before and after workouts and games."                                     |
| P13         | "We need more support and encouragement from the coaching staff to stick to our nutrition plans."                                             |
| P2          | "Having a designated nutrition area in the locker room stocked with healthy snacks would be convenient."                                      |
| P30         | "I'd like to see more emphasis on nutrition in our... team meetings and practices...it's often overlooked."                                   |
| P8          | "If we had regular check-ins with a nutritionist, it would help us stay on track and make adjustments as needed."                             |
| P19         | "We should have team challenges focused on nutrition, like who can try the most new fruits and vegetables in a week."                         |

- P17 "[laugh]Offering incentives for reaching nutrition goals, like gift cards or gear, would motivate us to stick to the plan."
- P23 "I think having a nutrition app specifically for our team would make it easier to track our food intake and progress [sigh]."
- P5 "We should have nutrition education sessions during preseason training to set the tone for the season."
- P22 "If the team culture... embraced nutrition more, it would make it easier for everyone to prioritize it."
- P16 "Having a team meal plan tailored to our dietary needs and preferences would save us time and stress."
- P4 "It would be helpful to have a designated team nutritionist who's available to answer questions and provide guidance."
- P21 "Incorporating nutrition education into our academic classes would reinforce its importance and make it more accessible."
-
